# Supplementary material for: Human Islet Response to Selected Type 1 Diabetes-Associated Bacteria: A Transcriptome-Based Study
Source: Front Immunol. 2019 Nov 8;10:2623. doi: 10.3389/fimmu.2019.02623 (PMC6857727; doi:10.3389/fimmu.2019.02623)
Supplement: Supplementary file 4 [file Table_4.xls]

## Sheet: Canonical pathways
Human islets differentially expressed canonical pathways induced by all treatments at 6 or 24h
Canonical Pathways	BD6h	BD24h	EC6h list	EC24h list	RG6h list	RG24h list	IL1B6h list	IL1B24h
TREM1 Signaling	3.317	3.162	3.873	3.464	3.606	3.162	4.123	3.153
Role of IL-17F in Allergic Inflammatory Airway Diseases	3.317	3.162	3.464	3.162	3.464	3.162	3.606	3.464
Th17 Activation Pathway	3	2.646	3.464	2.53	3.317	2.828	3.873	3.742
HMGB1 Signaling	2.496	2.887	3.638	3.317	3.357	3.464	2.353	3.153
Dendritic Cell Maturation	2.84	2.309	4.146	2.84	3.273	2.673	3.4	2.357
PPAR Signaling	-1.89	-2.449	-3.606	-2.828	-3.317	-2.828	-3.638	-2.496
Neuroinflammation Signaling Pathway	2	2.5	3.78	2.324	2.558	2.357	3.569	3.528
Osteoarthritis Pathway	2.111	1.897	3.441	2.496	3.207	2.887	3.78	2.646
Acute Phase Response Signaling	1.897	2.53	2.982	2.828	2.828	3.357	2.921	3.024
Colorectal Cancer Metastasis Signaling	1.89	2.646	3.357	2.333	1.897	2.53	2.858	2.985
IL-8 Signaling	2.236	2.828	2.111	2.449	2.449	2.828	2.668	2.84
iNOS Signaling	2.236	2	3.317	N/A	2.828	2.236	3.742	3.162
IL-1 Signaling	2.236	2.236	2.646	2	2.646	2.236	3.051	2.121
MIF Regulation of Innate Immunity	2.236	2.236	2.646	2	1.89	2.236	2.714	2.646
IL-6 Signaling	1.667	2.121	2.84	1.941	2.496	2.53	2.6	2.065
B Cell Receptor Signaling	2	N/A	2.714	2.449	3	2.236	2.858	2.84
MIF-mediated Glucocorticoid Regulation	2.236	2	2.449	2	2.449	2	2.121	2.449
LXR/RXR Activation	-2.121	-2.333	-1.886	-1.886	-2.53	-2.496	-1.877	-2.353
Production of Nitric Oxide and Reactive Oxygen Species in Macrophages	1.633	0.447	3.873	1.414	3.162	2.121	2.887	1.342
Pancreatic Adenocarcinoma Signaling	2	2	3	N/A	2.449	2.236	1.941	3
Aryl Hydrocarbon Receptor Signaling	2.449	2.449	1.667	1.633	2.121	2.449	2.5	1.265
IL-17A Signaling in Airway Cells	2.333	1.633	2.496	1.633	2.496	1.89	1.414	2.53
Th2 Pathway	2.236	N/A	2.496	2	2.714	2.236	2	1.897
PI3K/AKT Signaling	2.236	N/A	2.53	2	3.162	2.236	1.604	1.732
p38 MAPK Signaling	1.633	1.342	1.897	2.646	1.89	2.646	1.807	1.414
Antioxidant Action of Vitamin C	-2.121	-1.134	-2.714	-0.816	-2.714	-1.414	-2.673	-1.265
Adrenomedullin signaling pathway	1.342	1.134	2.496	2.111	2.333	1.897	1.877	1.46
PKCθ Signaling in T Lymphocytes	N/A	1	2.646	2	2.449	2	2.357	1.897
Tec Kinase Signaling	2	N/A	3	1	2.646	1.342	2.183	1.414
Apelin Endothelial Signaling Pathway	2	2	1.134	N/A	2	2	1.732	2.121
IL-7 Signaling Pathway	1.342	1	2.121	1.342	1.89	1.89	1.387	1.89
Type I Diabetes Mellitus Signaling	1.134	1	2.496	0.816	2.111	1.342	2.683	1.155
FAT10 Cancer Signaling Pathway	0.816	1	2.121	2	1.414	N/A	1.732	2.646
TNFR2 Signaling	1.342	1	1.89	N/A	1.89	1	2.53	1.342
PI3K Signaling in B Lymphocytes	1.342	0.378	1.897	0	2.111	0.707	2.84	1.387
Role of Pattern Recognition Receptors in Recognition of Bacteria and Viruses	2.236	N/A	2.646	N/A	2.449	N/A	1.508	1.633
Type II Diabetes Mellitus Signaling	1	N/A	2.646	1	2.449	N/A	1.604	1.633
TNFR1 Signaling	1	1	1.633	N/A	1.633	1	2.53	1.342
Oncostatin M Signaling	N/A	N/A	2.646	N/A	2.236	N/A	3	2.121
Leukocyte Extravasation Signaling	N/A	1.342	2.646	1.134	N/A	1.633	1.213	1.387
4-1BB Signaling in T Lymphocytes	2	N/A	2.236	N/A	2.236	N/A	2.646	N/A
iCOS-iCOSL Signaling in T Helper Cells	N/A	N/A	2.646	N/A	2.449	N/A	1.508	2.449
RANK Signaling in Osteoclasts	N/A	N/A	2.236	N/A	2.236	2	0.832	1.633
Small Cell Lung Cancer Signaling	2	N/A	2.236	N/A	2.236	N/A	0.333	2
Inhibition of Matrix Metalloproteases	N/A	N/A	-2.236	-1.633	N/A	-2	-1	-1.265
NF-κB Activation by Viruses	N/A	N/A	2.236	N/A	2.236	N/A	1	2.449
T Cell Exhaustion Signaling Pathway	N/A	N/A	1.134	N/A	1.342	1	2.138	2.121
GM-CSF Signaling	N/A	N/A	2.236	N/A	2	N/A	0.707	2
CD27 Signaling in Lymphocytes	N/A	N/A	2	N/A	2	N/A	1.265	1.342
SPINK1 General Cancer Pathway	N/A	-0.447	2	-0.816	2	-0.378	-0.632	0.302
GP6 Signaling Pathway	N/A	N/A	2.236	1.633	N/A	N/A	0.905	1.732
NGF Signaling	N/A	N/A	2	N/A	2.236	N/A	0.632	1.633
Chemokine Signaling	N/A	N/A	2	N/A	N/A	N/A	2.646	1.633
B Cell Activating Factor Signaling	N/A	N/A	2	N/A	2	N/A	2.236	N/A
Role of RIG1-like Receptors in Antiviral Innate Immunity	N/A	N/A	2	N/A	2	N/A	2	N/A
Ceramide Signaling	N/A	N/A	N/A	N/A	N/A	N/A	3.162	2.449
CD28 Signaling in T Helper Cells	N/A	N/A	2	N/A	N/A	N/A	1.508	2
NRF2-mediated Oxidative Stress Response	N/A	N/A	N/A	N/A	N/A	1.633	1.414	2.333
Interferon Signaling	N/A	N/A	2.121	N/A	1.342	N/A	1.134	0
SPINK1 Pancreatic Cancer Pathway	N/A	N/A	N/A	1.633	N/A	N/A	0	2.887
ERK5 Signaling	N/A	N/A	N/A	N/A	N/A	N/A	2.236	2
Renin-Angiotensin Signaling	N/A	N/A	2	N/A	N/A	N/A	1	1.134
Tryptophan Degradation to 2-amino-3-carboxymuconate Semialdehyde	N/A	N/A	N/A	N/A	N/A	N/A	2	2
p53 Signaling	N/A	N/A	2	N/A	N/A	N/A	1.897	0
BMP signaling pathway	N/A	N/A	N/A	N/A	N/A	N/A	1.633	2.236
Mouse Embryonic Stem Cell Pluripotency	N/A	N/A	N/A	N/A	1	N/A	0	2.646
ERK/MAPK Signaling	N/A	N/A	2	N/A	N/A	1	-0.535	0
Role of NANOG in Mammalian Embryonic Stem Cell Pluripotency	N/A	N/A	N/A	N/A	1	N/A	0.378	2
Inflammasome pathway	N/A	N/A	N/A	N/A	N/A	N/A	2	1.342
Tryptophan Degradation III (Eukaryotic)	N/A	N/A	N/A	N/A	N/A	N/A	2	1.342
NAD biosynthesis II (from tryptophan)	N/A	N/A	N/A	N/A	N/A	N/A	1.342	2
Gαi Signaling	N/A	N/A	N/A	N/A	N/A	N/A	-2.236	-0.632
IL-3 Signaling	N/A	N/A	2	N/A	N/A	N/A	0.707	N/A
Apelin Pancreas Signaling Pathway	N/A	N/A	N/A	N/A	N/A	N/A	-2.646	N/A
Glioma Invasiveness Signaling	N/A	N/A	N/A	N/A	N/A	N/A	0.378	2.236
Gα12/13 Signaling	N/A	N/A	0	N/A	N/A	N/A	0.302	2.236
Ethanol Degradation II	N/A	N/A	N/A	N/A	N/A	N/A	-2.236	N/A
IL-17A Signaling in Gastric Cells	N/A	N/A	N/A	N/A	N/A	N/A	2	N/A
Glutathione-mediated Detoxification	N/A	N/A	N/A	N/A	N/A	N/A	N/A	-2
Hypoxia Signaling in the Cardiovascular System	N/A	N/A	N/A	N/A	N/A	N/A	2	N/A
Oxidative Ethanol Degradation III	N/A	N/A	N/A	N/A	N/A	N/A	-2	N/A
Ethanol Degradation IV	N/A	N/A	N/A	N/A	N/A	N/A	-2	N/A
tRNA Charging	2	N/A	N/A	N/A	N/A	N/A	N/A	N/A
